# Supplementary material
Source: HighWire-hosted journal article supplement (http://thorax.bmjjournals.com/highwire/filestream/174112/field_highwire_adjunct_files/2/Thorax_Table_158956.pdf)
Supplement: Thorax_Table_158956.pdf [file Thorax_Table_158956.pdf]

**eTable 1. Multivariable analysis of exhaled nitric oxide (eNO) levels stratified by study site; Peru, 2009-2010.**

| Exposure                     | Lima (n=604)               |         | Tumbes (n=656)             |         | Heterogeneity (p-value) |
|------------------------------|----------------------------|---------|----------------------------|---------|-------------------------|
|                              | Difference in mean log eNO | p-value | Difference in mean log eNO | p-value |                         |
| Current asthma symptoms      | 0.78                       | <0.001  | 0.49                       | <0.001  | 0.04                    |
| Rhinitis in past 12 months   | 0.45                       | <0.001  | 0.54                       | <0.001  | 0.82                    |
| Atopy                        | 0.67                       | <0.001  | 0.45                       | <0.001  | 0.06                    |
| Eczema in past 12 months     | -0.35                      | <0.01   | -1.4                       | 0.52    | 0.66                    |
| Age                          | 0.17 per year              | <0.001  | -0.003 per year            | 0.94    | 0.03                    |
| Private sanitation facility  | 0.40                       | 0.10    | -0.32                      | <0.01   | <0.01                   |
| Woodstove use                | -0.65                      | <0.01   | 0.13                       | 0.19    | <0.01                   |
| Concrete floor               | 0.21                       | <0.01   | -0.05                      | 0.56    | 0.04                    |
| Mother had primary schooling | 0.04                       | 0.66    | 0.31                       | <0.01   | 1.0                     |
| BMI                          | 0.01 per kg/m <sup>2</sup> | 0.46    | 0.03 per kg/m <sup>2</sup> | 0.03    | 0.34                    |
| Female sex                   | -0.18                      | 0.07    | -0.13                      | 0.19    | 0.23                    |
| Height                       | 0.04 per 10 cm             | 0.46    | 0.07 per 10 cm             | 0.25    | 0.11                    |
| Second hand smoke            | -0.04                      | 0.73    | 0.11                       | 0.27    | 0.15                    |
| Personal smoking             | 0.27                       | 0.02    | -0.65                      | 0.12    | 0.13                    |
| Measured in spring           | 0.12                       | 0.41    | 0.09                       | 0.41    | 0.43                    |
| Measured in summer           | 0.33                       | 0.02    | 0.26                       | 0.02    | 0.94                    |
| Measured in winter           | 0.11                       | 0.47    | -0.38                      | 0.80    | 0.99                    |
| Income <175USD per month     | -0.04                      | 0.68    | -0.12                      | 0.19    | 0.18                    |
| 1+ parent from highlands     | 0.15                       | 0.12    | 0.10                       | 0.62    | 0.78                    |
